# Supplementary material
Source: PubMed Central journal article supplement (PMC6219906)
Supplement: NIHMS1506482-supplement-4.pdf [file NIHMS1506482-supplement-4.pdf]

**Table S1. Summary of the experimental characterization of designs.**

| Design name | Expressed | Soluble | Oligomeric state† | CD spectra (25 °C) | T <sub>m</sub> (°C) | HSQC quality* |
|-------------|-----------|---------|-------------------|--------------------|---------------------|---------------|
| BH_1        | Y         | Y       | A                 |                    |                     |               |
| BH_2        | Y         | Y       | A                 |                    |                     |               |
| BH_3        | N         |         |                   |                    |                     |               |
| BH_4        | Y         | Y       | A                 |                    |                     |               |
| BH_5        | Y         | Y       | D                 |                    |                     |               |
| BH_6        | Y         | Y       | D                 |                    |                     |               |
| BH_7        | Low       | Y       |                   |                    |                     |               |
| BH_8        | Y         | Y       |                   |                    |                     |               |
| BH_9        | Low       | Y       | A                 |                    |                     |               |
| BH_10       | Y         | Y       | M                 | β                  | > 95°C              | High          |
| BH_11       | Y         | Y       | M                 | β                  | > 95°C              | High          |
| BH_12       | Y         | Y       | A                 |                    |                     |               |
| BH_6_ss1    | Y         | Y       | D                 |                    |                     |               |
| BH_6_ss2    | Y         | Y       | D                 |                    |                     |               |
| BH_6_ss3    | Y         | Y       | A                 |                    |                     |               |
| BH_12_ss1   | Y         | Y       | A                 |                    |                     |               |
| BH_12_ss2   | Y         | Y       | A                 |                    |                     |               |
| BH_12_ss3   | Y         | Y       | A                 |                    |                     |               |
| BH_13       | Y         | Y       | A                 |                    |                     |               |

† Oligomeric state of the dominant species based on SEC-MALS ('M', monomer; 'D', dimer). 'A' denotes dominant aggregate or high-molecular weight species.

\* Well-dispersed HSQC spectra with a number of peaks closely matching the number of amide resonances were considered of high quality and promising for NMR structure determination.

**Table S2. Designed protein sequences.** The lowest E-value obtained from BLAST searches (against the NCBI nr database of non-redundant protein sequences) is shown.

| Design name | Amino acid sequence                                                                                         | E-value |
|-------------|-------------------------------------------------------------------------------------------------------------|---------|
| BH_1        | PETKTYRFTPGEEREYEFNTDVEVEVNHDM EITVNGQTQRYT<br>PGTSVRVPPGSRVRIRVND DVKVNWHER                                | 3.2     |
| BH_2        | QHTRTYRLTPGEEQEFKYNT PMTMHVEVNTDVEIEYNGKEQR<br>YPPGTEVEIEVRPGTKVRIKVNTDVRVEIREN                             | 2.8     |
| BH_3        | PETRTYRFTPGEEREF EFDTNVEFRFDSDVEVTVNGQTTRVP<br>PGSSVEVPPGSRIRVNTDLQVEVRRR                                   | 1.1     |
| BH_4        | PETRTYRFTPGEEREF EHD TNVKWKFNTDVEIERNGERTRFT<br>PGEEVEVPPGTRVRIRVNTDVQFTLERN                                | 3.6     |
| BH_5        | PERREIRLSPGERYTFTVD TDVQFRVEKPVRVRHDGTETEYK<br>PGTHLRLPPGTSVTFEVD TDVRFEIQRN                                | 0.016   |
| BH_6        | PERREIRLSPGERYTFTVD TPVQFRVEKPVRVRYDGTETELKP<br>GSHLRLPPGTSITFEVD TPVRFEIQRN                                | 0.011   |
| BH_7        | SRYEITGNPGTRVELREN P GSRVKSNA PGRSERNGEHRTWN<br>PGESRTSNRPSTMEVESD GPISIEIRE                                | 0.8     |
| BH_8        | ESKKITVNAGERMTLHLNAGTEVRSEGGREHSNGQTQQWP<br>PGSTIRSDQPTTTTTFESDRPLTLEVRQ                                    | 3.5     |
| BH_9        | KTKTYTVNPGEKVTITMNP GDEMTAEGPVTSRARGQEQT VNP<br>GETVRVNEPGTFTLESDR PVTVKIQH                                 | >10     |
| BH_10       | TRETKVTVNPGEEYEVKVN P GTRVEIQAKGPAEFEGGTRTR<br>LNPGESYKFENLTSQPLR IRLRNLSDTPIEFRIEE                         | 6.3     |
| BH_11       | SERREYEVNPGERMEFTINKGERFEFKTNRPM TVRVELDGRE<br>ERYTATPGESISVQNSDN PARVEIQNDSDEPVRVEVRRH                     | 4.5     |
| BH_12       | PIDVRIRMPPGSTFRVTIKTDVEVQVNKPVRVEHDGTRTEYKP<br>GTHLRIPP GSEVRF EVD TDVEFRFKVTD PETVKEMEEHAREH<br>LEYETRSD   | 1.0     |
| BH_6_ss1    | PERRCIRLSPGERYTFTVD TPVCFRVEKPVRVRYDGTETELKP<br>GSHLCLPPGTSITFEVD TPVRF CIQRN                               | 0.013   |
| BH_6_ss2    | PERREICLSPGERYTFTVD TPVQFRVEKPVRVRYDGTETELKP<br>GSHLRLPPGTSITFEVD TPVCFEIQRN                                | 0.003   |
| BH_6_ss3    | PERREIRLSPGERYTFTVD TPVQFCVEKPVRVRYDGTETELKP<br>GSCLRLPPGTSITFEVD TPVRFEIQRN                                | 0.012   |
| BH_12_ss1   | PIDVRICMPPGSTFRVTIKTPVEVQVNKPVRVEYDGTRETELKP<br>GSHLRIPP GSEIRFEVD TPVCFR FKVTD PETVKEMEEHAREHG<br>LEYETRSD | 0.98    |
| BH_12_ss2   | PIDCRIRMPPGSTFRVTIKTPVEVQVNKPVRVEYDGTRETELKP<br>GSHLRIPP GSEIRFEVD TPVEFRFKVTD PETVKEMEEHAREHG<br>LEYECSRSD | 6.8     |
| BH_12_ss3   | PIDCRIRMPPGSTFRVTIKTPVEVQVNKPVRVEYDGTRETELKP<br>GSHLRIPP GSEIRFEVD TPVEFRFKVTD PETVKECEEHAREHG<br>LEYETRSD  | 7.7     |
| BH_13       | NCDVRVRVPPGSEVRLTFKTDVRIEVKNPMEVRHDGTETRYT<br>PGTHLRIPP GSQVDFRVNTDVEFHLEMDNPETAKEVEEQARR<br>QGVEVEVRCQ     | 1.9     |

**Table S3. Computed scores for experimentally characterized designs.** Hydrogen bonding (hbond\_bb\_sc, hbond\_lr\_bb and hbond\_sr\_bb) and backbone torsional (rama) energy scores were averaged over all loop residue positions, and the fa\_atr score term accounting for attractive Van der Waals interactions was averaged over all residues. Designs in the table were ranked based on “hbond\_sum” (sum of the three hydrogen bonding average scores), rama and “loops w/Pro” (number of loops containing at least one proline). Designs with substantially higher fa\_atr scores (indicative of underpacked hydrophobic cores) were placed at the end of the ranking (BH\_7, BH\_9 and BH\_8). Only those designs without disulfide bonds or extra helical domains were considered in this analysis. The two monomeric designs with well-ordered structures (BH\_10 and BH\_11) are those with the best compromise of the three scores considered.

| Design name | hbond_sum | hbond_bb_sc | hbond_lr_bb | hbond_sr_bb | rama   | loops w/Pro | fa_atr |
|-------------|-----------|-------------|-------------|-------------|--------|-------------|--------|
| BH_11       | -0.651    | -0.220      | -0.328      | -0.103      | -0.161 | 5           | -4.510 |
| BH_10       | -0.556    | -0.109      | -0.348      | -0.099      | -0.142 | 6           | -4.334 |
| BH_2        | -0.557    | -0.120      | -0.391      | -0.046      | -0.138 | 4           | -4.557 |
| BH_1        | -0.545    | -0.086      | -0.406      | -0.053      | -0.150 | 3           | -4.609 |
| BH_3        | -0.547    | -0.076      | -0.429      | -0.042      | -0.113 | 3           | -4.367 |
| BH_6        | -0.531    | -0.073      | -0.396      | -0.061      | -0.085 | 6           | -4.478 |
| BH_4        | -0.515    | -0.055      | -0.337      | -0.124      | -0.137 | 3           | -4.679 |
| BH_5        | -0.535    | -0.077      | -0.395      | -0.063      | -0.088 | 4           | -4.575 |
| BH_7        | -0.617    | -0.162      | -0.333      | -0.122      | -0.125 | 6           | -3.691 |
| BH_9        | -0.557    | -0.094      | -0.344      | -0.120      | -0.104 | 6           | -3.652 |
| BH_8        | -0.622    | -0.150      | -0.338      | -0.134      | -0.087 | 4           | -3.842 |

**Table S4. Contact order of *de novo* designed all- $\alpha$  protein domains with experimentally solved structures from previous studies.** We have considered as domains those designs with more than or equal to 30 amino acids.

| <b>PDB id</b> | <b>Size (aa)</b> | <b>Contact order</b> | <b>PDB id</b> | <b>Size (aa)</b> | <b>Contact order</b> |
|---------------|------------------|----------------------|---------------|------------------|----------------------|
| 6B85          | 215              | 9.4                  | 5CWP          | 244              | 16.7                 |
| 6B87          | 100              | 10.9                 | 5CWQ          | 240              | 18.8                 |
| 5TGY          | 109              | 9.9                  | 5CWN          | 217              | 14.0                 |
| 5UOI          | 43               | 7.9                  | 5CWO          | 219              | 17.2                 |
| 2ND2          | 44               | 7.5                  | 2LSE          | 101              | 11.5                 |
| 5KWZ          | 26               | 7.8                  | 4TQL          | 229              | 28.5                 |
| 5J0L          | 130              | 17.2                 | 4UOT          | 35               | 3.6                  |
| 5IZS          | 77               | 10.0                 | 4UOS          | 193              | 20.1                 |
| 5J0H          | 72               | 10.5                 | 4YXX          | 208              | 16.5                 |
| 5J0I          | 75               | 8.5                  | 4YXZ          | 278              | 20.2                 |
| 5J0J          | 70               | 10.6                 | 5BYO          | 372              | 21.3                 |
| 5J0K          | 78               | 10.3                 | 4YY2          | 99               | 13.5                 |
| 5J10          | 70               | 8.7                  | 4N9G          | 35               | 5.8                  |
| 5J2L          | 76               | 10.9                 | 4OYD          | 159              | 24.4                 |
| 5J73          | 75               | 6.5                  | 5VMR          | 140              | 12.7                 |
| 5E6G          | 113              | 14.7                 | 5VID          | 131              | 12.7                 |
| 2N8W          | 104              | 12.8                 | 5V2O          | 62               | 8.7                  |
| 2N8I          | 100              | 11.2                 | 5WOD          | 38               | 11.2                 |
| 5CWB          | 230              | 20.5                 | 4PN8          | 30               | 3.5                  |
| 5CWC          | 238              | 17.5                 | 4PN9          | 29               | 3.5                  |
| 5CWD          | 172              | 18.8                 | 4PNA          | 31               | 3.6                  |
| 5CWF          | 198              | 16.7                 | 4PNB          | 30               | 3.5                  |
| 5CWG          | 250              | 19.5                 | 4PND          | 31               | 3.5                  |
| 5CWH          | 179              | 9.2                  | 3SOR          | 30               | 3.5                  |
| 5CWI          | 260              | 24.1                 | 5EHB          | 27               | 3.4                  |
| 5CWJ          | 190              | 15.1                 | 2A3D          | 73               | 10.0                 |
| 5CWK          | 175              | 11.5                 | 1RH4          | 30               | 3.3                  |
| 5CWL          | 195              | 16.5                 | 4DAC          | 26               | 3.5                  |
| 5CWM          | 228              | 13.9                 |               |                  |                      |

**Table S5. Contact order of *de novo* designed  $\alpha\beta$ -protein domains with experimentally solved structures from previous studies.** We have considered as domains those designs with more than or equal to 30 amino acids.

| <b>PDB id</b> | <b>Size (aa)</b> | <b>Contact order</b> | <b>PDB id</b> | <b>Size (aa)</b> | <b>Contact order</b> |
|---------------|------------------|----------------------|---------------|------------------|----------------------|
| 5L33          | 109              | 20.2                 | 2LV8          | 110              | 21.7                 |
| 5TPH          | 120              | 20.3                 | 2LVB          | 112              | 27.8                 |
| 5TPJ          | 122              | 20.0                 | 2MTL          | 88               | 23.1                 |
| 5TRV          | 118              | 19.9                 | 2LR0          | 134              | 24.3                 |
| 5TS4          | 101              | 17.5                 | 2KPO          | 110              | 21.9                 |
| 5U35          | 130              | 22.4                 | 2LRH          | 134              | 23.2                 |
| 5KPH          | 85               | 11.9                 | 2LTA          | 110              | 21.4                 |
| 5KPE          | 120              | 16.9                 | 2LN3          | 83               | 18.2                 |
| 4R80          | 76               | 13.9                 | 2LND          | 112              | 29.5                 |
| 5UP1          | 64               | 14.8                 | 2LCI          | 134              | 25.3                 |
| 5UP5          | 40               | 14.2                 | 2L82          | 162              | 30.2                 |
| 5UYO          | 45               | 9.2                  | 2L69          | 134              | 22.7                 |
| 5JG9          | 47               | 15.7                 | 2KL8          | 85               | 24.2                 |
| 5JHI          | 35               | 14.7                 | 4RJV          | 83               | 24.3                 |
| 5JI4          | 37               | 14.0                 | 2MR5          | 136              | 26.5                 |
| 2ND3          | 38               | 10.0                 | 2MRA          | 117              | 22.7                 |
| 2N75          | 99               | 17.4                 | 2MR6          | 136              | 26.4                 |
| 2N76          | 112              | 29.9                 | 2MBM          | 120              | 21.2                 |
| 2N2T          | 84               | 25.4                 | 2MQ8          | 112              | 30.5                 |
| 2N2U          | 77               | 21.2                 | 5GAJ          | 134              | 25.7                 |
| 2N3Z          | 99               | 17.4                 | 5BVL          | 180              | 23.7                 |
| 5VLI          | 39               | 14.3                 | 2KI0          | 36               | 12.8                 |
| 1QYS          | 91               | 18.2                 |               |                  |                      |
